# Supplementary material
Source: MDPI journal article supplement (https://www.mdpi.com/2072-4292/9/12/1267)
Supplement: s1 [file s1]

## Supporting Information for

# **Estimating diurnal courses of gross primary production for maize: a comparison of sun-induced chlorophyll fluorescence, light-use efficiency and process-based models**

Tianxiang Cui <sup>1,2</sup>, Rui Sun <sup>1,2,\*</sup>, Chen Qiao <sup>1,2</sup>, Qiang Zhang <sup>1,2</sup>, Tao Yu <sup>1,2</sup>, Gang Liu <sup>1,2</sup> and Zhigang Liu <sup>1,2</sup>

<sup>1</sup> State Key Laboratory of Remote Sensing Science, Jointly Sponsored by Beijing Normal University and Institute of Remote Sensing and Digital Earth of Chinese Academy of Sciences, Beijing 100875, China; txiang.c@gmail.com (T.C.); qiaochenbnu@gmail.com (C.Q.); zhangqiang1228@mail.bnu.edu.cn (Q.Z.); yutaogis@163.com (T.Y.); 1015220446@qq.com (G.L.); zhigangliu@bnu.edu.cn (Z.L)

<sup>2</sup> Beijing Engineering Research Center for Global Land Remote Sensing Products, Institute of Remote Sensing Science and Engineering, Faculty of Geographical Science, Beijing Normal University, Beijing 100875, China

\* Correspondence: sunrui@bnu.edu.cn; Tel.: +86-10-5880-5457

## **Introduction**

This supporting file provides a more detailed description of the method to determining water stress factor in the MuSyQ-GPP algorithm and results obtained using SIF686.

## **Text S1. Estimation of water stress factor in the MuSyQ-GPP algorithm**

The limited effect of water conditions on plant photosynthesis, ranging between 0.5 and 1, is derived following the algorithm

$$f_2(\beta)=0.5+0.5E / E_p \quad (1)$$

where  $E$  and  $E_p$  represent actual and potential evapotranspiration, respectively.

In the MuSyQ-GPP algorithm, a modified Penman-Monteith (P-M) approach with biome-specific canopy conductance was used to estimate actual evapotranspiration (Qiao et al. 2015; Zhang et al. 2009). The available energy component for canopy ( $A_{\text{canopy}}$ ) and soil ( $A_{\text{soil}}$ ) are generated using FPAR

$$A_{\text{canopy}} = \text{FPAR} \times A \quad (2)$$

$$A_{\text{soil}} = (1 - \text{FPAR}) \times A \quad (3)$$

where  $A$  is approximated as net radiation consisting both net shortwave radiation and net longwave radiation. Vegetation transpiration is defined as

$$\lambda E_{\text{canopy}} = \frac{\Delta A_{\text{canopy}} + \rho C_p \text{VPD} g_a}{\Delta + \gamma(1 + g_a / g_c)} \quad (4)$$

where  $\lambda E_{\text{canopy}}$  ( $\text{W m}^{-2}$ ) is the latent heat flux of canopy,  $\Delta = d(e_{\text{sat}})/dT$  ( $\text{Pa K}^{-1}$ ) is the slope of the curve relating saturated water vapor pressure  $e_{\text{sat}}$  (Pa) to air temperature  $T$  (K),  $\rho$  ( $\text{kg m}^{-3}$ ) is air density,  $C_p$  ( $\text{J kg}^{-1} \text{K}^{-1}$ ) is the specific heat of air at constant pressure,  $\text{VPD} = e_{\text{sat}} - e$  (Pa) is the vapor pressure deficit of air,  $g_a$  ( $\text{m s}^{-1}$ ) is aerodynamic conductance and defined as  $0.01 \text{ m s}^{-1}$  in our study by referring to Zhang et al. (2008),  $\gamma$  ( $\text{Pa K}^{-1}$ ) is psychrometric constant, and  $g_c$  ( $\text{m s}^{-1}$ ) is canopy conductance and can be described as

$$g_c = \frac{g_{\text{sx}}}{K_Q} \ln \left[ \frac{Q_h + Q_{50}}{Q_h \exp(-K_Q \text{LAI}) + Q_{50}} \right] \left[ \frac{1}{1 + \text{VPD}/D_{50}} \right] \quad (5)$$

where  $K_Q$  is the extinction coefficient for PAR,  $Q_h$  is the PAR at the top of canopy,  $Q_{50}$  and  $D_{50}$  are the values of APAR and water vapor deficit when stomatal conductance is half its maximum value, respectively. For our study, values of  $g_{\text{sx}}$ ,  $K_Q$  and  $D_{50}$  are assigned to  $0.0032 \text{ m s}^{-1}$ ,  $0.6$  and  $800 \text{ Pa}$ , respectively (Zhang et al., 2008).

Soil evaporation is calculated using a soil evaporation equation (Mu et al. 2011; Zhang et al. 2009):

$$\lambda E_{\text{soil}} = RH^{(\text{VPD}/k)} \frac{\Delta A_{\text{soil}} + \rho C_p \text{VPD} g_a}{\Delta + \gamma \times g_a / g_{\text{totc}}} \quad (6)$$

where  $\lambda E_{\text{soil}}$  ( $\text{W m}^{-2}$ ) is the latent heat flux of soil,  $RH$  is the relative humidity of air with

values ranging from 0 to 1,  $k$  (Pa) is a parameter to fit the complementary relationship and is empirically adjusted for different vegetation types, and  $g_{\text{totc}}$  ( $\text{m s}^{-1}$ ) is the corrected value of total aerodynamic conductance as described by Zhang et al. (2010).

The potential evapotranspiration,  $E_p$ , is calculated using the Priestley and Taylor (P-T) equation (Priestley and Taylor, 1972).

$$\lambda E_p = \varphi A \frac{\Delta}{\Delta + \gamma} \quad (7)$$

where the P-T coefficient  $\varphi$  was set to 1.26 following Priestley and Taylor (1972) in the study.

## Text S2. Performance of the SIF<sub>686</sub>-based GPP model

SIF<sub>686</sub> was less correlated with GPP than SIF<sub>760</sub>. The optical absorption at far-red band of a leaf is smaller than 10%, while it is over 90% at the red band (Jacquemoud and Baret, 1990). The reabsorption of SIF<sub>686</sub> influenced by chlorophyll content and canopy structure is larger than that of SIF<sub>760</sub> (Liu et al. 2016, 2017). Therefore, SIF<sub>686</sub> values presented a larger diversity than SIF<sub>760</sub> at the four positions of the canopy and the SIF<sub>686</sub>-based GPP model showed a much limited performance than SIF<sub>760</sub>.

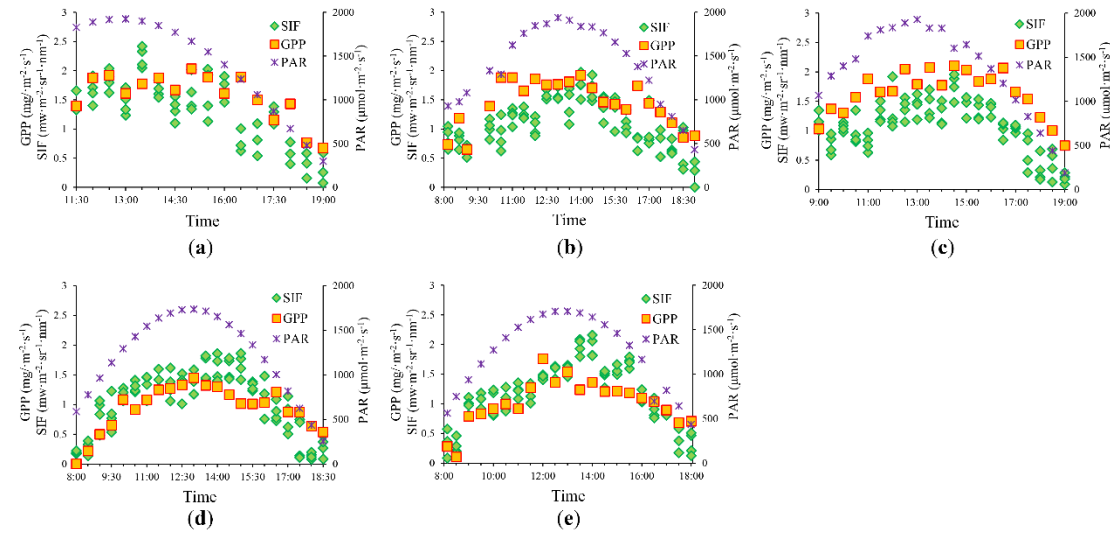

**Figure S1.** Diurnal patterns of PAR, GPP and SIF<sub>686</sub> during the experiment: (a) July 10th. (b) July 17th. (c) July 18th. (d) August 21st. (e) August 22nd.

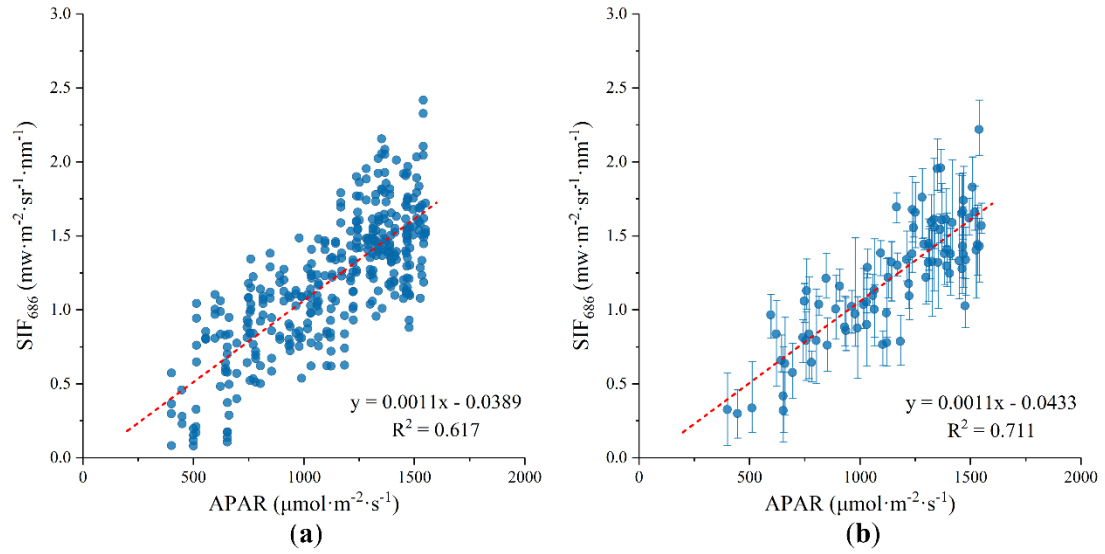

**Figure S2.** Relationship between APAR and (a) individual SIF<sub>686</sub> and (b) averaged SIF<sub>686</sub>. The error bar indicates the range of SIF<sub>686</sub> values for four measurements.

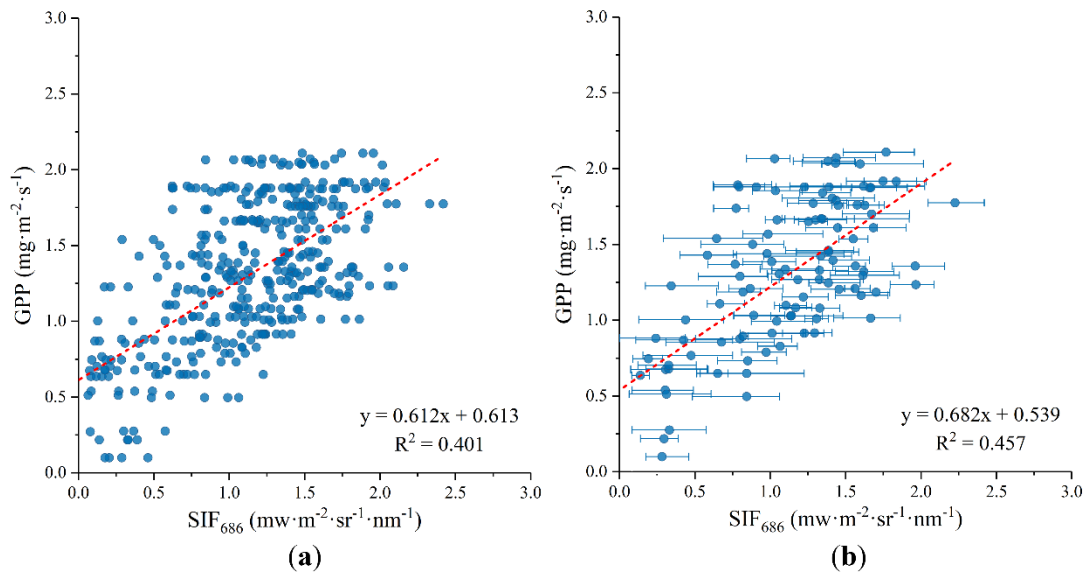

**Figure S3.** Relationship between (a) individual SIF<sub>686</sub> and GPP, (b) averaged SIF<sub>686</sub> and GPP. The error bars indicate the range of SIF<sub>686</sub> values for the four measurements.

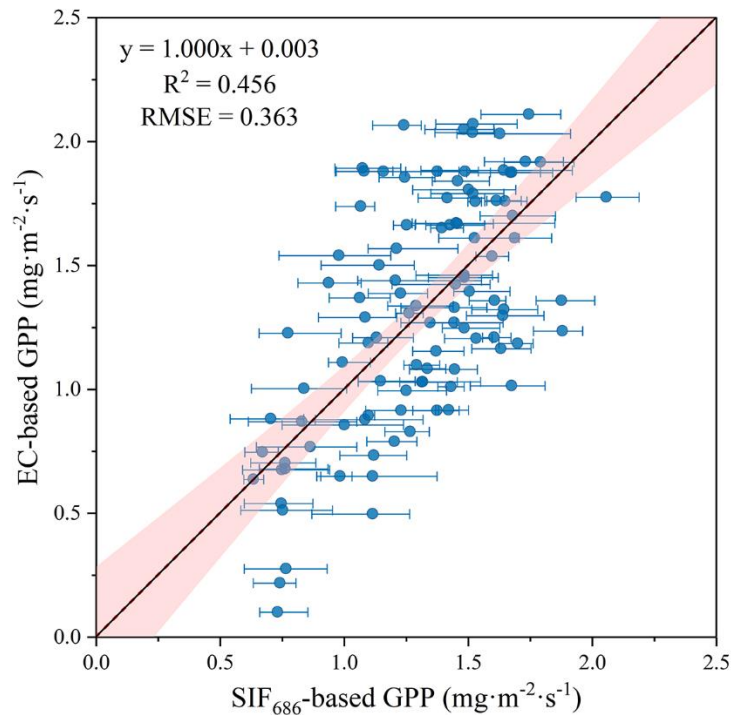

**Figure S4.** Relationships between SIF<sub>686</sub>-based GPP and EC-based GPP during the experiment period. The red shades represent the 95% confidence bands for the regression functions.

## References

- Mu, Q.Z., Zhao, M.S., Running, S.W., 2011. Improvements to a MODIS global terrestrial evapotranspiration algorithm. *Remote Sensing of Environment*, 115, 1781-1800. <https://doi.org/10.1016/j.rse.2011.02.019>.
- Priestley, C.H.B., Taylor, R.J., 1972. On the assessment of surface heat flux and evaporation using large-scale parameters. *Monthly weather review*, 100, 81-92. [https://doi.org/10.1175/1520-0493\(1972\)100<0081:otaosh>2.3.co;2](https://doi.org/10.1175/1520-0493(1972)100<0081:otaosh>2.3.co;2).
- Qiao, C., Sun, R., Xu, Z.W., Zhang, L., Liu, L.Y., Hao, L.Y., Jiang, G.Q., 2015. A Study of Shelterbelt Transpiration and Cropland Evapotranspiration in an Irrigated Area in the Middle Reaches of the Heihe River in Northwestern China. *IEEE Geoscience and Remote Sensing Letters*, 12, 369-373.

<https://doi.org/10.1109/lgrs.2014.2342219>.

Zhang, K., Kimball, J.S., Mu, Q.Z., Jones, L.A., Goetz, S.J., Running, S.W., 2009.

Satellite based analysis of northern ET trends and associated changes in the regional water balance from 1983 to 2005. *Journal of Hydrology*, 379, 92-110.

<https://doi.org/10.1016/j.jhydrol.2009.09.047>.

Zhang, K., Kimball, J.S., Nemani, R.R., Running, S.W., 2010. A continuous satellite-

derived global record of land surface evapotranspiration from 1983 to 2006. *Water*

*Resources Research*, 46. <https://doi.org/10.1029/2009wr008800>.

Zhang, Y.Q., Chiew, F.H.S., Zhang, L., Leuning, R., Cleugh, H.A., 2008. Estimating

catchment evaporation and runoff using MODIS leaf area index and the Penman-

Monteith equation. *Water Resources Research*, 44.

<https://doi.org/10.1029/2007wr006563>.

Jacquemoud, S., Baret, F. 1990. PROSPECT: A Model of Leaf Optical

Properties spectra. *Remote Sensing of Environment*, 34: 75–91.

[https://doi.org/10.1016/0034-4257\(90\)90100-Z](https://doi.org/10.1016/0034-4257(90)90100-Z).

Liu, L.Y., Liu, X.J., Guan, L.L. 2016. Uncertainties in linking solar-induced chlorophyll

fluorescence to plant photosynthetic activities. *Geoscience and Remote Sensing*

*Symposium (IGARSS)*, 2016 IEEE International, 4414-4417.

Liu, L.Y., Liu, X.J., Hu, J.C., Guan, L.L. 2017. Assessing the wavelength-dependent

ability of solar-induced chlorophyll fluorescence to estimate the GPP of winter

wheat at the canopy level. *International Journal of Remote Sensing*, 38: 4396-4417.

<http://dx.doi.org/10.1080/01431161.2017.1320449>
